# Supplementary material for: Patterns of nitrogen and phosphorus pools in terrestrial ecosystems in China
Source: Copernicus journal article supplement (doi:10.5194/essd-13-5337-2021), 2021-11-17
Supplement: Supplementary file 1 [file essd-13-5337-2021-supplement.pdf]

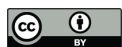

*Supplement of*

## **Patterns of nitrogen and phosphorus pools in terrestrial ecosystems in China**

**Yi-Wei Zhang et al.**

*Correspondence to:* Zhiyao Tang (zytang@urban.pku.edu.cn)

The copyright of individual parts of the supplement might differ from the article licence.

## 1 Supplement

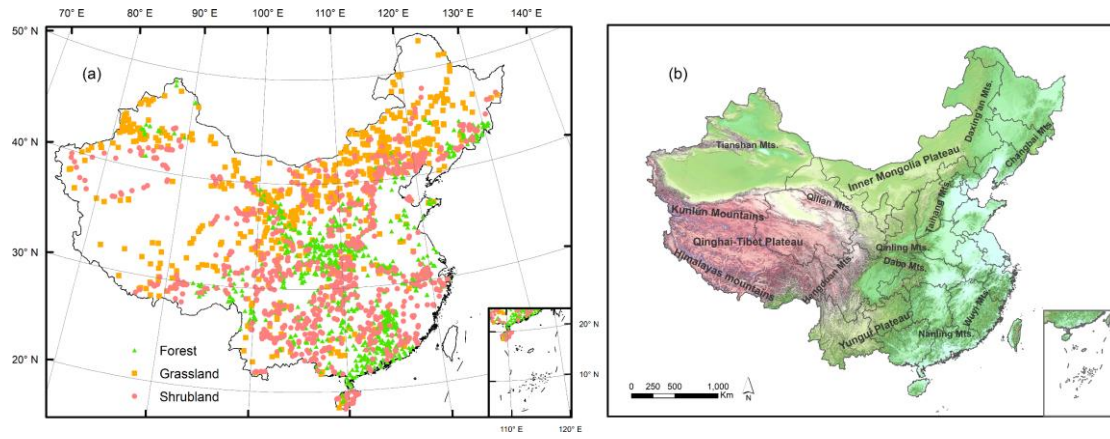

**Fig. S1.** The spatial distribution of sampling sites (a) and the topographic map of China (b).

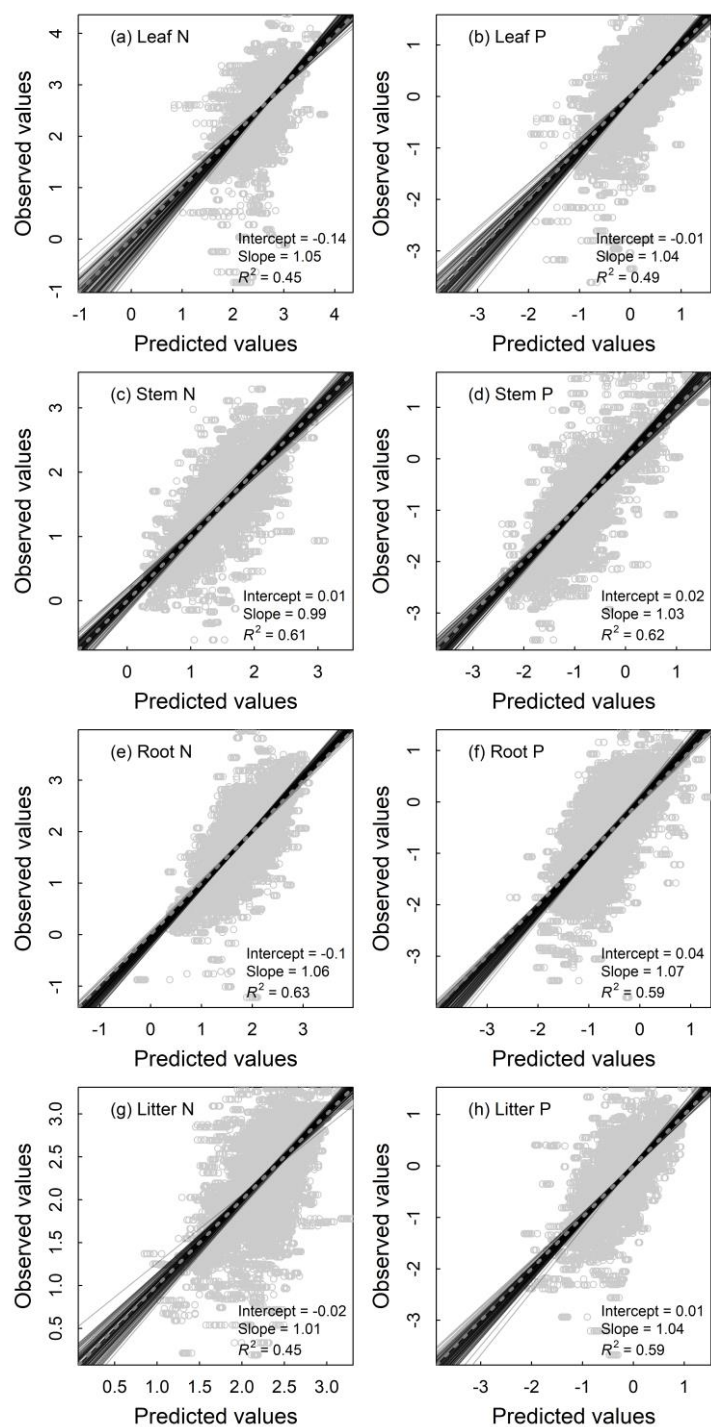

6 **Fig. S2.** Fitting performance of random forest models for nutrient concentrations of leaves (a  
7 & b), woody stems (c & d), roots (e & f) and litter (g & h) of terrestrial ecosystems in China  
8 based on 100 times of replications with the 10% validation data. Solid lines represent all the  
9 fitting lines, and the displayed parameters stand for the average conditions. The dashed line  
10 denotes the 1:1 line.

11

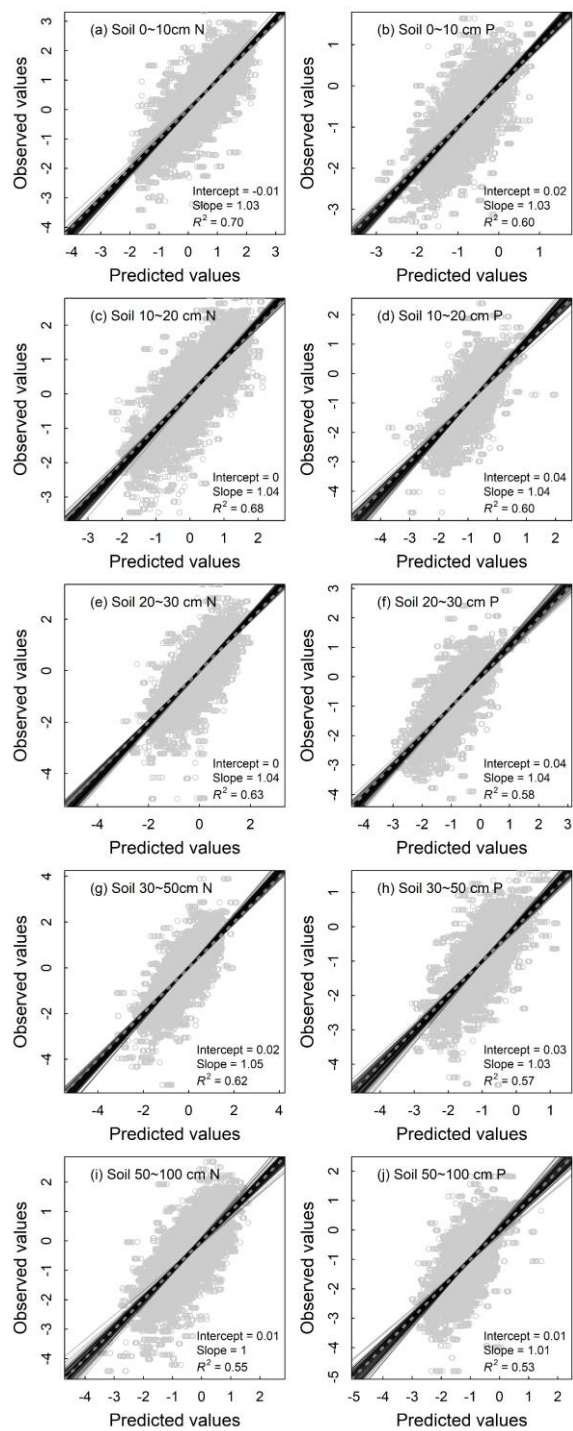

**Fig. S3.** Fitting performance of random forest models for nutrient concentrations of 0–10 cm (a & b), 10–20 cm (c & d), 20–30 cm (e & f), 30–50 cm (g & h) and 50–100 cm (i & j) soil layers of terrestrial ecosystems in China based on 100 times of replications with the 10% validation data. Solid lines represent all the fitting lines, and the displayed parameters stand for the average conditions. The dashed line denotes the 1:1 line.

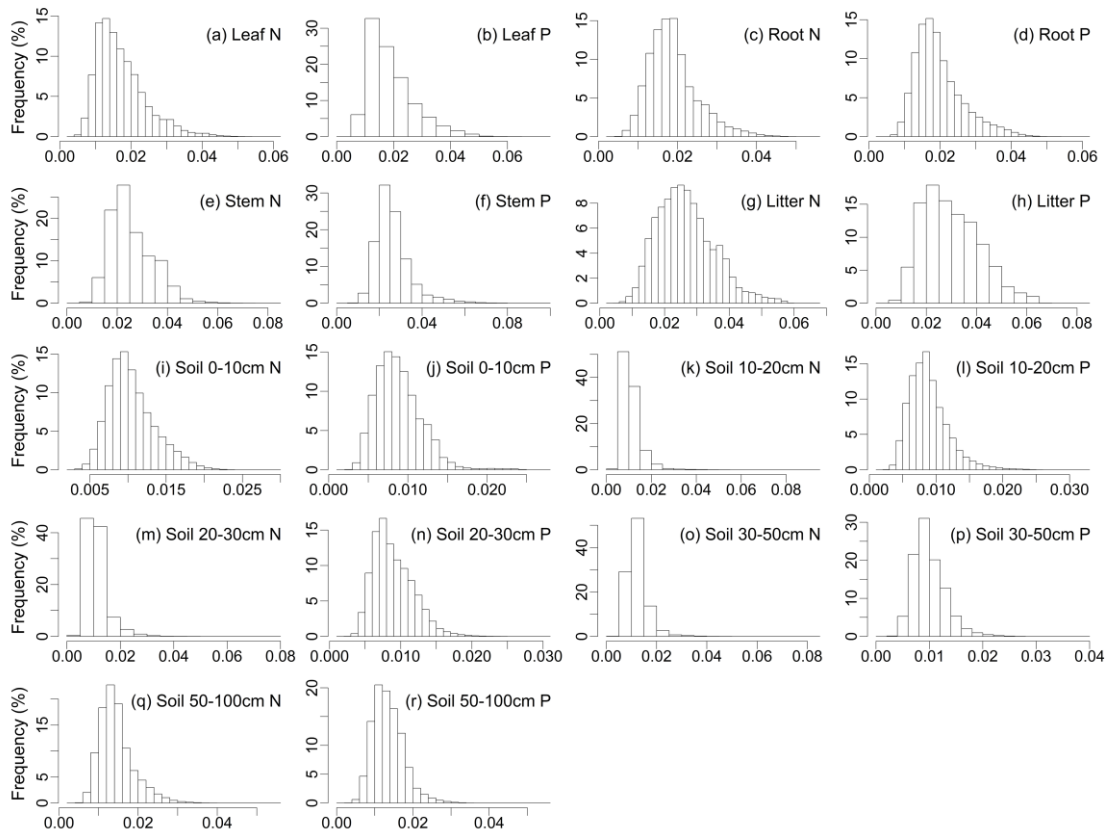

**Fig. S4.** Frequency distributions of standard deviations of the predictions in models for N and P densities in different components.

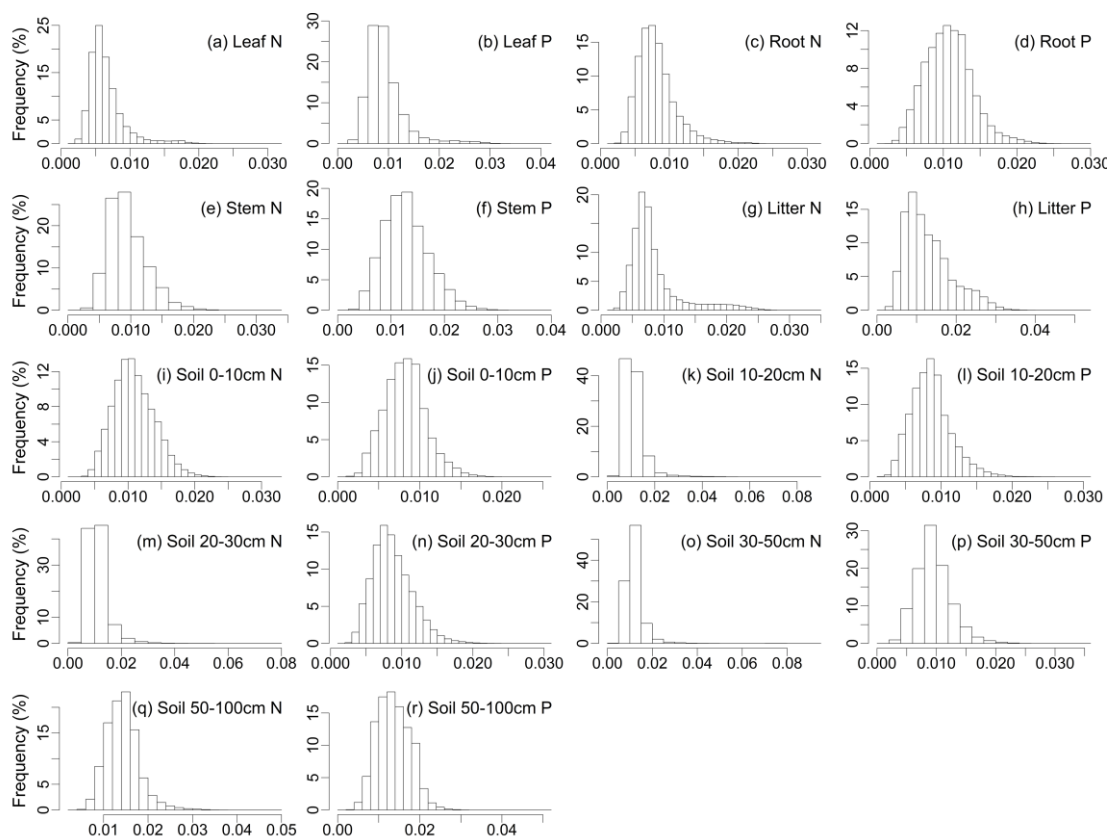

**Fig. S5.** Frequency distributions of standard deviations of the predictions in models for N and P concentrations in different components.



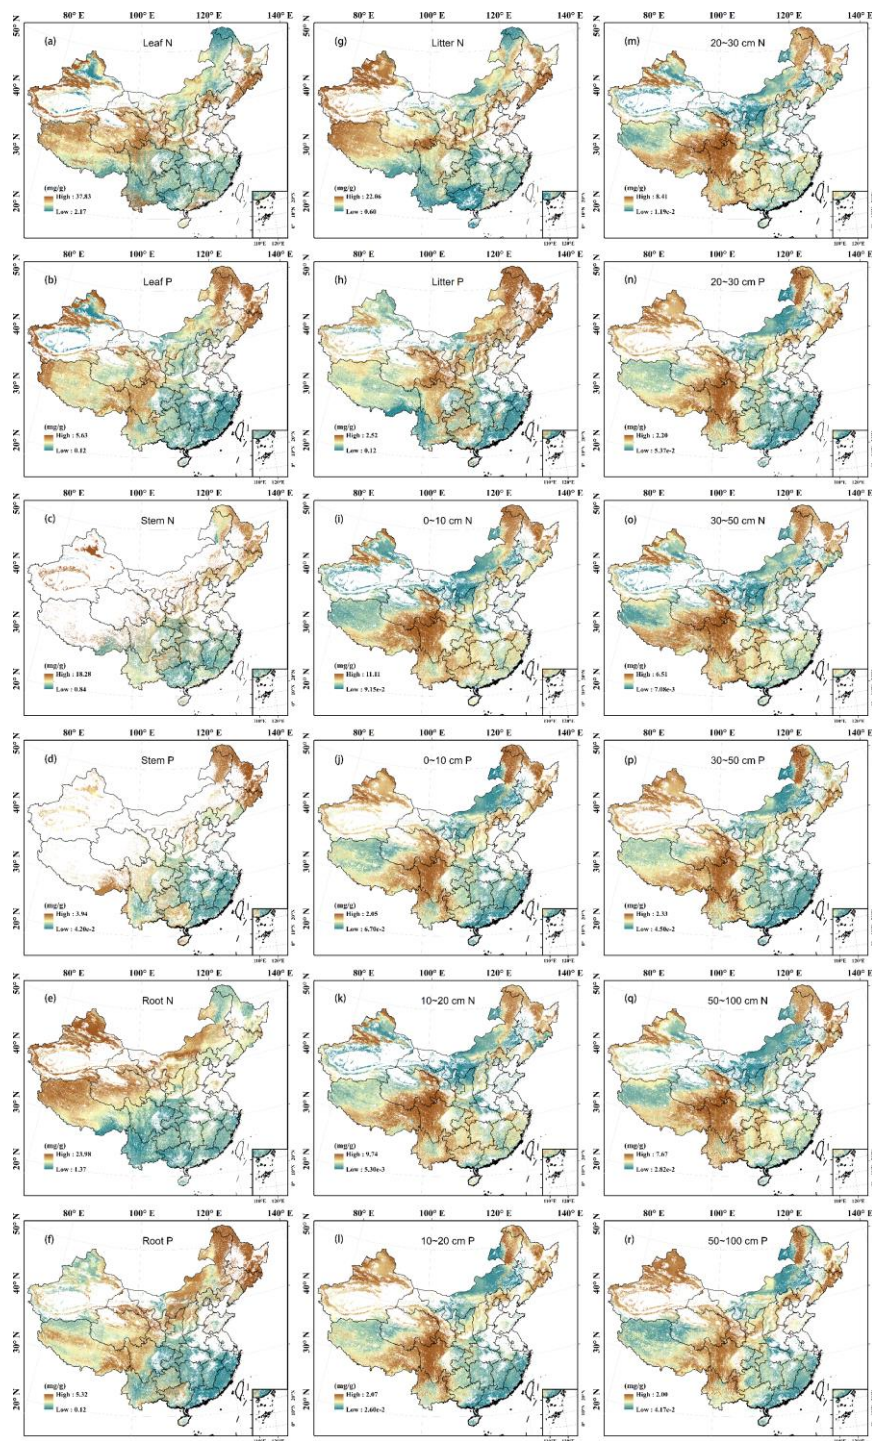

29 **Fig. S6.** Predicted spatial patterns of N and P concentrations with a resolution of 1 km in plant  
30 organs (a–f), litter (g & h), and soil layers (i–r) of terrestrial ecosystems in China.  
31

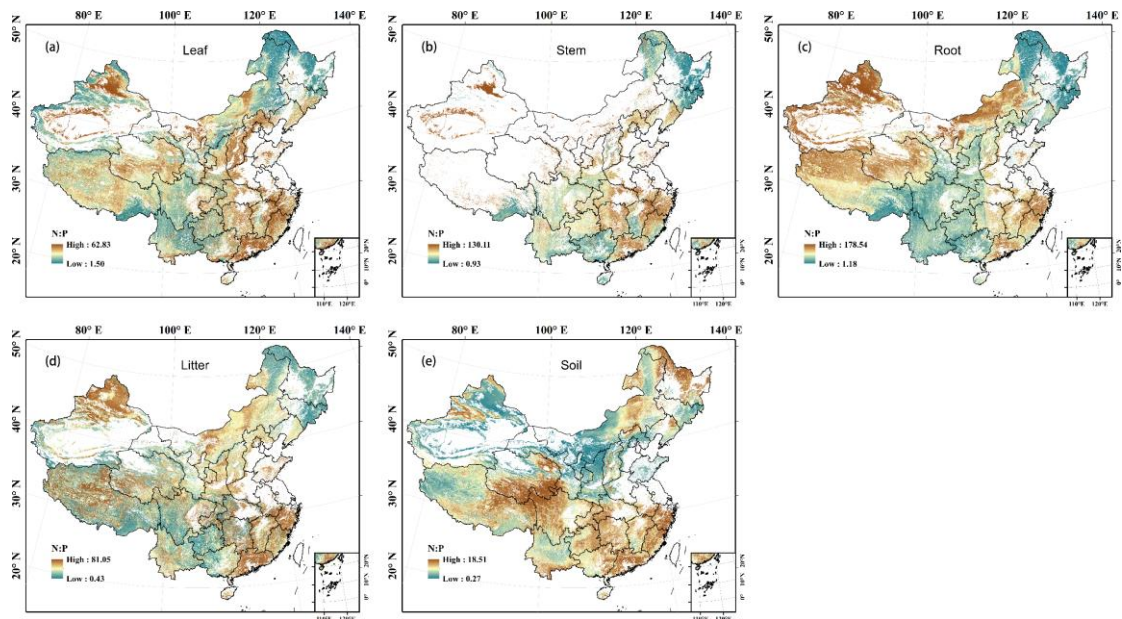

**Fig. S7.** Predicted spatial patterns of N:P ratios with a resolution of 1 km in leaves (a), woody stems (b), roots (c), litter (d) and soil (e) of terrestrial ecosystems in China.

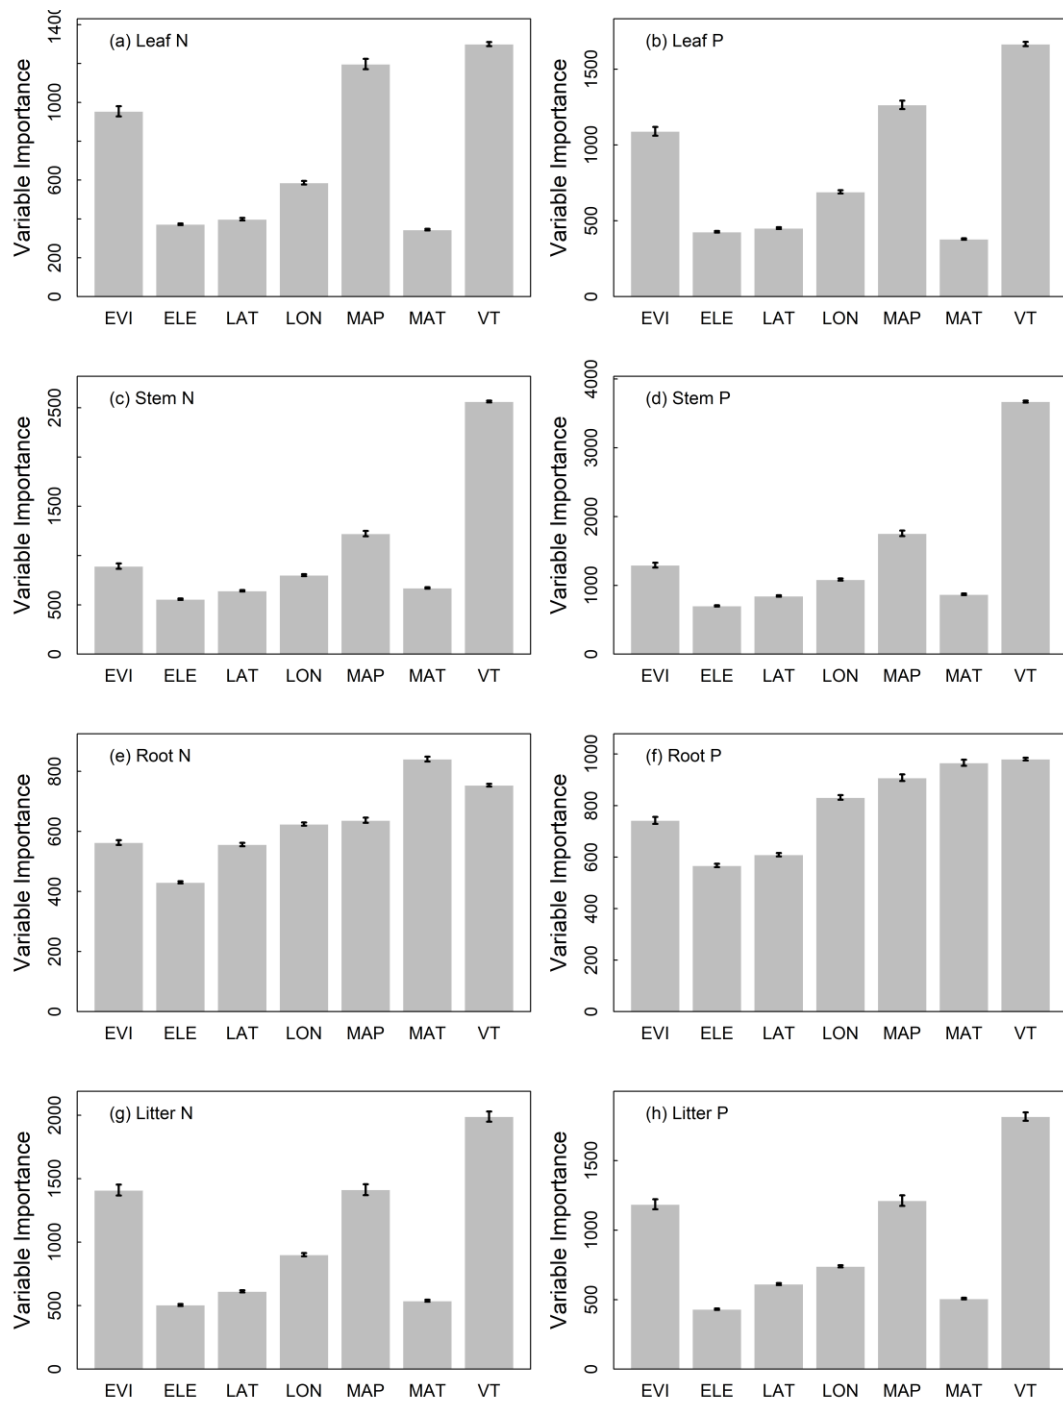

37 **Fig. S8.** The relative importance of variables in random forest models of N and P densities for  
38 leaf (a & b), stem (c & d), root (e & f) and litter (g & h).  
39

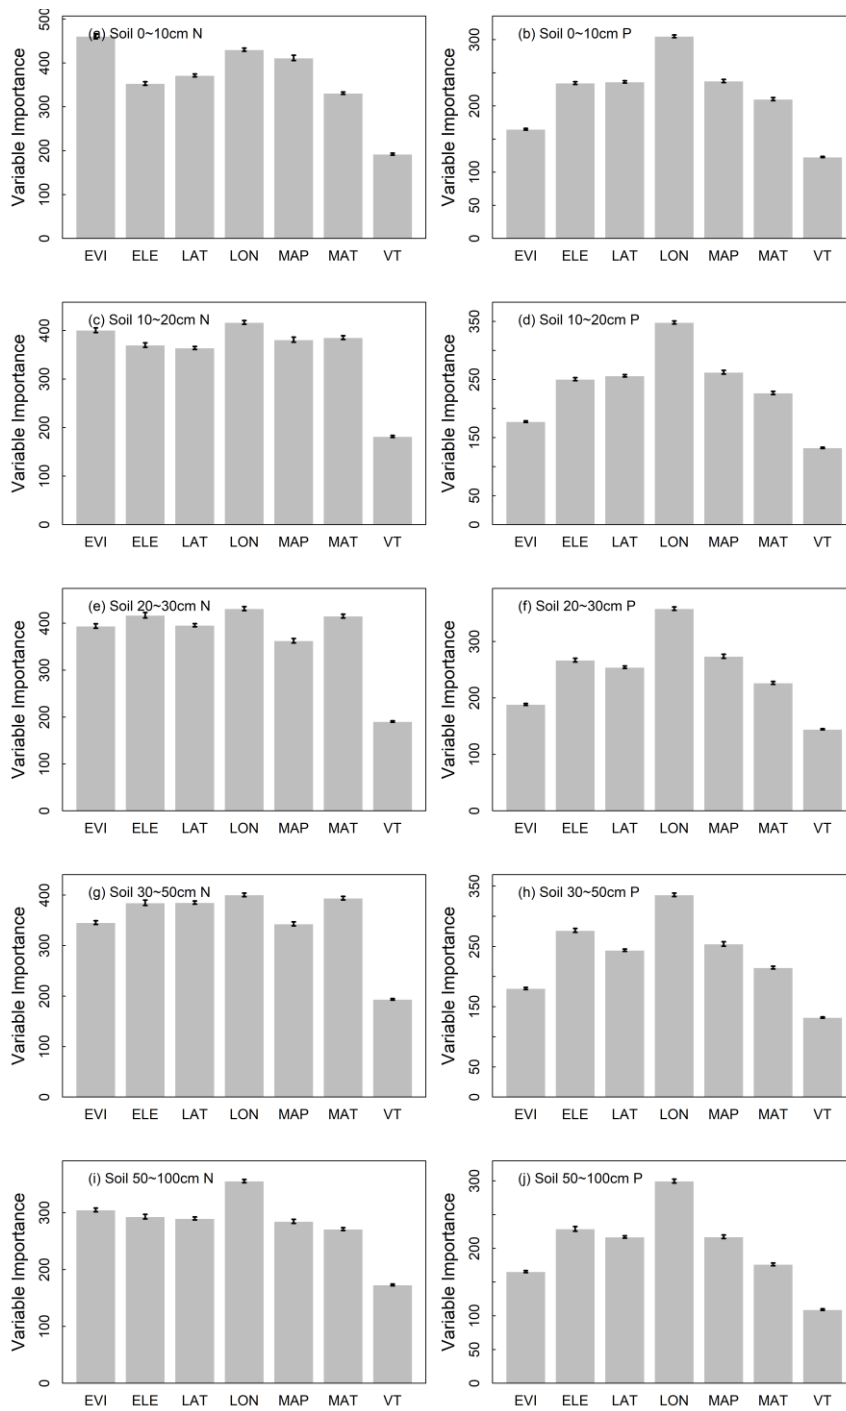

41 **Fig. S9.** The relative importance of variables in random forest models of N and P densities for  
42 0-10 cm (a & b), 10-20 cm (c & d), 20-30 cm (e & f) 30-50 cm (g & h) and 50-100 cm (i & j)  
43 soil layers.  
44

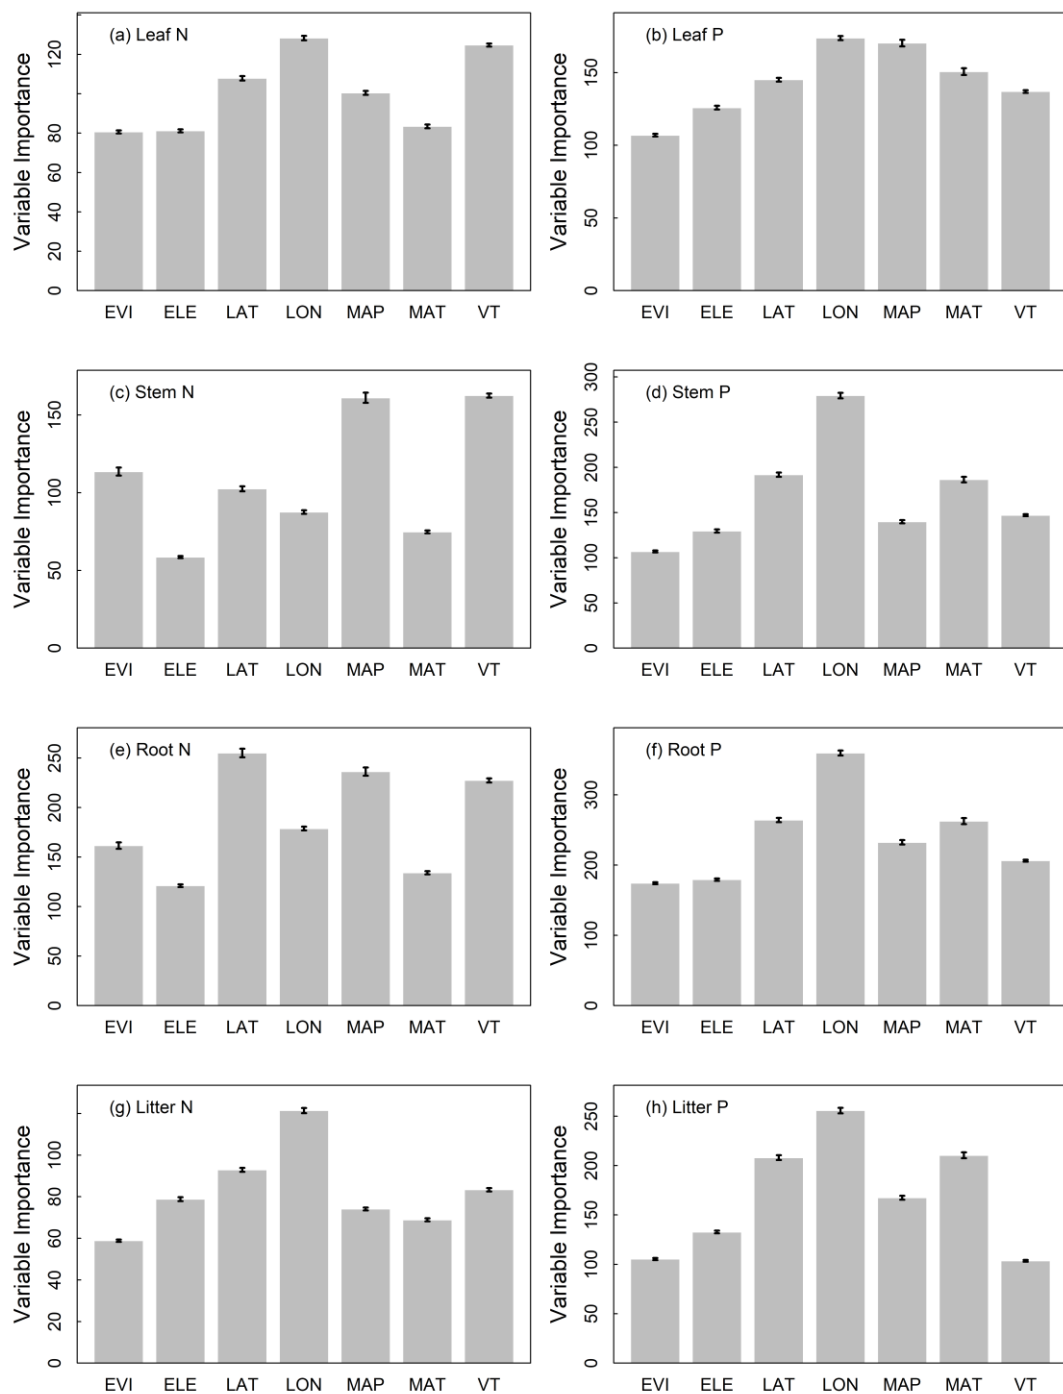



46 **Fig. S10.** The relative importance of variables in random forest models of N and P  
47 concentrations for leaf (a & b), stem (c & d), root (e & f) and litter (g & h).  
48

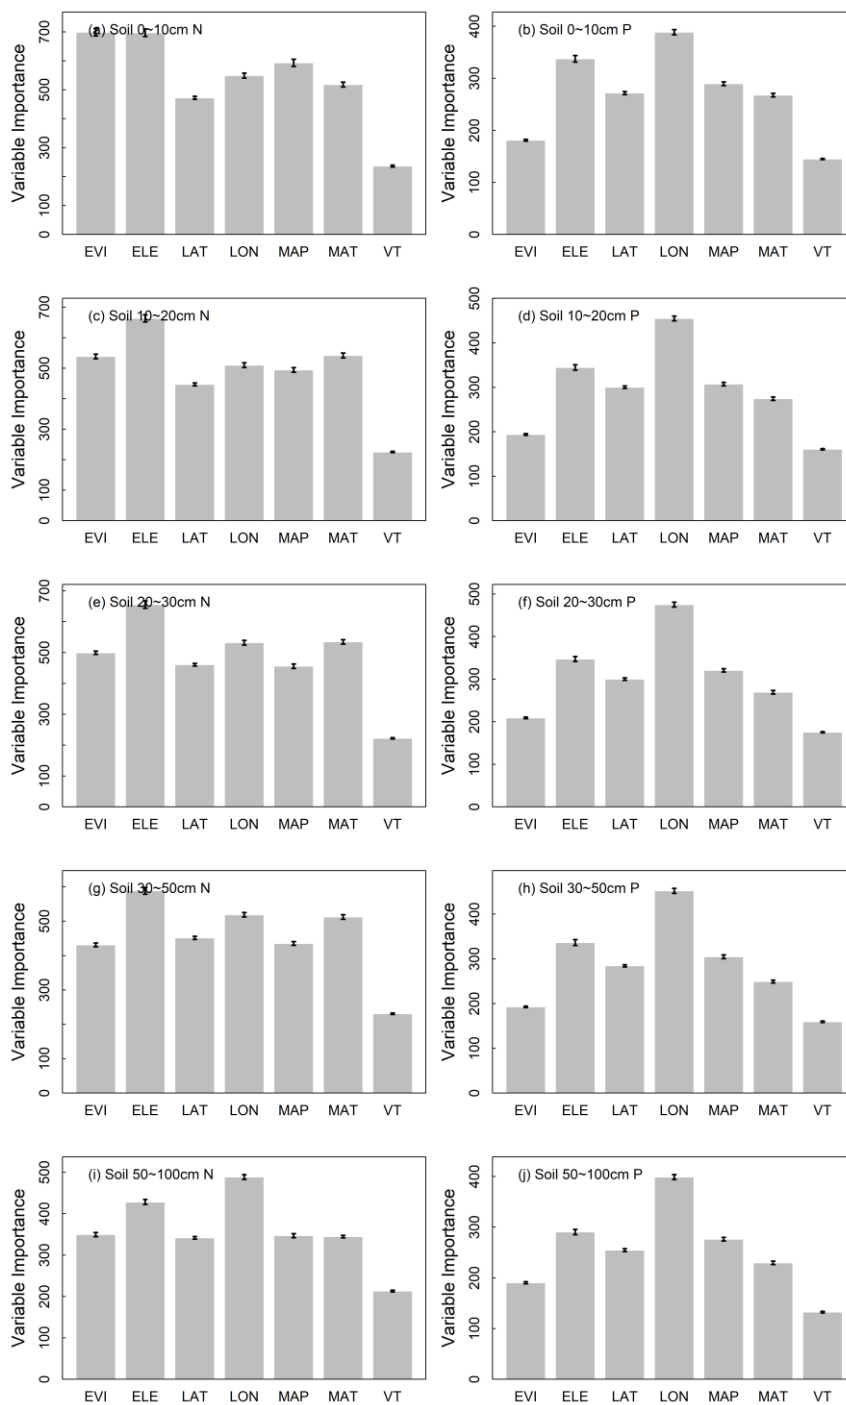

50 **Fig. S11.** The relative importance of variables in random forest models of N and P  
51 concentrations for 0-10 cm (a & b), 10-20 cm (c & d), 20-30 cm (e & f) 30-50 cm (g & h) and  
52 50-100 cm (i & j) soil layers.  
53
